**Title: Towards a Global Framework for Estimating Acclimation and Thermal Breadth that Predicts Risk from Climate Change**

**Short Title: A Framework for Acclimation and Thermal Breadth**

**Authors:** Jason R Rohr<sup>\*</sup>, David J. Civitello<sup>\*†</sup>, Jeremy M. Cohen<sup>\*</sup>, Elizabeth A. Roznik<sup>\*</sup>, Barry Sinervo<sup>‡</sup>, Anthony I. Dell<sup>§§</sup>

**Affiliations:**

<sup>\*</sup>University of South Florida, Department of Integrative Biology, Tampa, FL 33620, USA.

<sup>†</sup>Emory University, Department of Biology, Atlanta, GA 30322

<sup>‡</sup>University of California at Santa Cruz, Department of Ecology and Evolutionary Biology, Santa Cruz, CA 95064, USA.

<sup>§</sup>National Great Rivers Research and Education Centre (NGRREC), Alton, IL, USA.

<sup>§</sup>Department of Biology, Washington University in St. Louis, St. Louis, MO, USA.

**Corresponding Author:** Jason Rohr, University of South Florida, Department of Integrative Biology, Tampa, FL 33620, USA, [jasonrohr@gmail.com](mailto:jasonrohr@gmail.com), 813-974-0156

**Keywords:** Acclimation, Amphibian declines, Global climate change, Phenotypic plasticity, Thermal biology

**Author Contributions**

JRR developed the ideas, conducted the analyses, generated the figures, and wrote the manuscript. AID and EAR developed the thermal performance curve and critical thermal maxima databases, respectively. DJC developed the mathematical model. JMC fit the Johnson-Lewin and Weibull curves to the thermal performance data. BS suggested the utility of critical thermal maximum studies in amphibians for acclimation analyses. All authors edited the manuscript.

1 **Thermal breadth, the range of body temperatures over which organisms perform well, and**  
2 **thermal acclimation, the ability to alter optimal performance temperature and critical**  
3 **thermal maximum or minimum with changing temperatures, reflect the capacity of**  
4 **organisms to respond to temperature variability and are thus crucial traits for coping with**  
5 **climate change. Although there are theoretical frameworks for predicting thermal**  
6 **breadths and acclimation, the predictions of these models have not been tested across taxa,**  
7 **latitudes, body sizes, traits, habitats, and methodological factors. Here, we address this**  
8 **knowledge gap using simulation modeling and empirical analyses of >2,000 acclimation**  
9 **strengths from >500 species using four datasets of ectotherms. After accounting for**  
10 **important statistical interactions, covariates, and experimental artifacts, we reveal that i)**  
11 **acclimation rate scales positively with body size contributing to a negative association**  
12 **between body size and thermal breadth across species and ii) acclimation capacity**  
13 **increases with body size, seasonality, and latitude (to mid-latitude regions) and is**  
14 **regularly underestimated for most organisms. Contrary to suggestions that plasticity**  
15 **theory and empirical work on thermal acclimation are incongruent, these findings are**  
16 **consistent with theory on phenotypic plasticity. We further validated our framework by**  
17 **demonstrating that it could predict global extinction risk to amphibian biodiversity from**  
18 **climate change.**

19 Reversible thermal acclimation is an often beneficial change in a biological trait – such as  
20 metabolism, behavior, immunity, or the expression of heat shock proteins<sup>1-4</sup> – in response to  
21 temperature variation<sup>5-9</sup>. For example, extended exposure to higher temperatures can cause a  
22 physiological change in an organism that increases its critical thermal maximum ( $CT_{max}$ ; mean  
23 temperature that causes disorganized locomotion, subjecting the individual to likely death)<sup>10</sup> and

24 optimal performance temperature ( $T_{opt}$ ), thus enhancing its tolerance to and reducing opportunity  
25 costs (lost foraging and mating opportunities) from higher temperatures<sup>11,12</sup>. Additionally,  
26 differential rates of acclimation have been proposed as a mechanism by which global climate  
27 change (GCC) indirectly causes population declines by altering species interactions<sup>4,13,14</sup>. Thus,  
28 acclimation ability has been proposed as a trait that allows species to cope with global warming  
29 and increased climate variability, two hallmarks of anthropogenic GCC<sup>15-17</sup>.

30 Much is known, unknown, and controversial regarding acclimation responses. For  
31 instance, theory suggests that organisms found in locations with high temperature variability  
32 might experience selection for greater acclimation abilities<sup>6,21</sup> or thermal breadths – the range of  
33 body temperatures over which organisms perform well<sup>18-20</sup> (Fig. 1). Both acclimation and  
34 thermal breadth are important because models of plasticity based on first principles<sup>6,21,22</sup> suggest  
35 that organisms can exhibit plasticity in both their thermal breadths and their thermal modes,  
36 maxima, and minima. Nevertheless, researchers have suggested that, contrary to this theory,  
37 acclimation of thermal optima rarely occurs in laboratory experiments<sup>6</sup> and the capacity for  
38 acclimation rarely correlates with the magnitude or predictability of thermal heterogeneity in the  
39 environment<sup>6,20,23</sup>. Hence, whether acclimation plasticity of thermal optima generally occurs and  
40 whether acclimation plasticity increases with temperature variability or latitude from tropical to  
41 mid-latitude regions remains controversial<sup>18-20,23,24</sup>. Additionally, body masses and  
42 temperature seasonality generally decrease toward the equator, especially for aquatic  
43 species<sup>25,26, but see 27</sup>, and body mass is generally positively correlated with lifespan<sup>28</sup>. For these  
44 reasons, larger, longer-lived organisms are more likely to be exposed to extreme seasonal and  
45 interannual temperatures that likely select for acclimation than smaller, shorter-lived organisms.  
46 Finally, smaller-bodied species have higher mass-specific metabolic rates<sup>28,29</sup>, heat and cool

47 faster due to their lower thermal inertia, and have fewer cells and physiological processes to  
48 adjust than larger organisms. For these reasons, theory based on first principles suggests that  
49 reversible acclimation capacities and rates might be positively and negatively correlated with  
50 body size across species, respectively<sup>6,21,22,28</sup>, but these patterns have never been demonstrated.

51 In addition to organismal traits, acclimation responses can also be affected by  
52 experimental methodologies (Fig. 1). As an example, the strength of acclimation responses are  
53 well documented to be positively associated with acclimation duration, which is how long  
54 experimenters hold organisms at an acclimation temperature before exposing them to the test  
55 temperature<sup>10</sup>. This is unsurprising because acclimation takes time.

56 Importantly, the effects of experimental methodologies can regularly depend on  
57 organismal traits, such as body size, causing significant statistical interactions between these  
58 factors (Fig. 1); this, in turn can have several consequences for accurately measuring thermal  
59 acclimation and breadth (Fig. 1). For example, if heating rates in  $CT_{max}$  or  $CT_{min}$  trials are low,  
60 or if there is a delay between when organisms are placed at a test temperature and when trait  
61 performance is measured, then smaller organisms, because of their likely faster acclimation rates,  
62 might be more likely to acclimate to these new temperatures during trials. This will reduce the  
63 correlation between the change in acclimation temperature and the change in thermal tolerance  
64 (e.g.  $CT_{max}$ ,  $T_{opt}$ ) – a common index of acclimation abilities – resulting in a greater  
65 underestimation of the acclimation of smaller than larger organisms. Likewise, if the duration of  
66 time held at an acclimation temperature is short, there may be sufficient time for smaller but not  
67 larger species to fully acclimate, this time underestimating the acclimation abilities of larger  
68 organisms. Given the well-documented correlations among body size, latitude, temperature  
69 variability, and habitat, and experimental artifacts that can arise because of interactions between

70 experimental methodologies and body size, biologists run the risk of drawing erroneous  
71 conclusions regarding the ability to cope with GCC unless these factors and interactions are  
72 considered simultaneously in synthetic statistical models, which is highlighted by our conceptual  
73 framework and hypotheses provided in Fig. 1. Despite the likely importance of body size to  
74 thermal acclimation, biologists understand little about how body size variation across species –  
75 or interactions among experimental methodologies, latitude, habitat, and body size –shape  
76 acclimation responses<sup>but see<sup>19,29,30</sup></sup>. Once the aforementioned methodological and organismal  
77 factors are considered, we expect acclimation abilities to be greater for larger than smaller  
78 organisms, to decline from temperate to tropical regions, and for thermal breadths to be inversely  
79 correlated with body size (see SI Appendix for a discussion of how acclimation might also  
80 depend on trait identity). If these patterns emerge, they would represent the first synthesis of  
81 thermal tolerance responses to be entirely consistent with theory on thermal plasticity and  
82 metabolic rates (see<sup>6,20,23</sup> for extended discussions of the inconsistency between plasticity theory  
83 and empirical results on thermal acclimation).

84 Here, we address these knowledge gaps and our conceptual framework and hypotheses  
85 using mathematical modeling and meta-analysis of four empirical datasets, all of which provide  
86 acclimation duration, latitude, body masses, and an index of the strength of acclimation plasticity  
87 of ectotherms (See SI Appendix, Table S1). Given that ectotherms represent ~99.9% of all  
88 named species<sup>31</sup>, our analyses are relevant to most of Earth's biodiversity (see SI Appendix for  
89 discussion on endotherms). The first dataset of Seebacher et al.<sup>20</sup> provides 651 indices of  
90 acclimation strength, measured as the  $Q_{10}$  of acclimation thermal sensitivity (see Methods), for  
91 191 species. The second dataset of Gunderson and Stillman<sup>23</sup> provides 288 acclimation response  
92 ratios of  $CT_{maxs}$  for 231 species. An acclimation response ratio (ARR) is the change in a thermal

93 tolerance measurement (e.g.,  $T_{opt}$  or  $CT_{max}$ ) per unit change in acclimation temperature<sup>23</sup> and  
94 thus, the larger the ARR the stronger the acclimation response. We added body size to both of  
95 these datasets, because neither Seebacher et al.<sup>20</sup> nor Gunderson and Stillman<sup>23</sup> included size in  
96 their original analyses, which we believe might explain why both studies failed to find evidence  
97 that thermal acclimation plasticity was positively associated with either temperature variability  
98 or latitude.

99         The third dataset we use was published by Dell et al.<sup>32,33</sup> and contains 2,445 thermal  
100 response curves of ectotherms (128 of which had acclimation temperature and non-monotonic  
101 performance curves, which are necessary to compute  $T_{opt}$ ) measured on various traits of  
102 organisms spanning three kingdoms of life (Animalia, Fungi, and Plantae). This is also the only  
103 dataset to provide information on the thermal breadth of species (operationally defined as the  
104 width of the thermal response curve at 75% of the maximum height<sup>6</sup>) and the duration of time  
105 between when organisms were placed at a test temperature and when a thermal trait was first  
106 measured (See SI Appendix, Table S1). Unlike Seebacher et al.<sup>20</sup> and Gunderson and Stillman<sup>23</sup>,  
107 the Dell et al.<sup>32,33</sup> dataset runs the risk of conflating fixed and plastic responses because  
108 acclimation temperatures vary across rather than within species. However, if fixed and plastic  
109 responses were confounded, then tropical species in the Dell et al.<sup>32,33</sup> dataset should have  
110 significantly warmer acclimation temperatures than temperate or polar species, but we found that  
111 acclimation temperature was uncorrelated with the absolute value of latitude ( $X^2=0.43$ ,  $P=0.513$ ;  
112 controlling for habitat), suggesting that this conflation is weak at best. Nevertheless, as a  
113 precaution, we predominantly use the Dell et al.<sup>32,33</sup> dataset to test hypotheses regarding thermal  
114 breadth and the duration of time between when organisms were placed at a test temperature and  
115 when performance was measured (Fig. 1). The final dataset consists of 1,040 estimates of  $CT_{maxs}$

116 for 251 species of amphibians and is used predominantly to validate our acclimation and breadth  
117 framework (Fig. 1, See SI Appendix, Table S1).

118

### 119 **Effect of body size on acclimation rate**

120 We first tested the hypothesis that time to acclimate is positively related to body size  
121 (Methods). Given that acclimation takes time, the underlying assumption of these analyses is  
122 that once an organism is shifted to a new temperature, thermal tolerance will change  
123 asymptotically through time and will be faster for smaller than larger organisms. More precisely,  
124 because acclimation is a metabolic process, we predict that it should scale with body size  
125 similarly to how metabolic rate scales with mass, which scales allometrically to the one-quarter  
126 power<sup>34,35</sup>. Data limitations in all our datasets prohibited us from estimating a mass-scaling  
127 exponent for acclimation (see SI Appendix for details). Instead, we indirectly tested our body-  
128 size hypothesis by rationalizing that if acclimation rate is negatively correlated with size, then  
129 when acclimation duration is short, a signal of acclimation should be apparent for small but not  
130 large organisms. We found support for this hypothesis on two fronts.

131 First, in the Gunderson and Stillman dataset, short acclimation durations were sufficient  
132 to detect acclimation (a positive ARR) for small organisms but longer acclimation durations  
133 were necessary to detect a positive ARR for larger organisms (Three-way interaction Acc. time x  
134 mass x heat rate:  $X^2=5.27$ ,  $P=0.022$ ; Fig. 2a,c). Additionally, body size and acclimation duration  
135 interacted similarly to affect acclimation signatures (i.e., a positive correlation between  
136 acclimation temperature and  $T_{opt}$  or  $CT_{max}$ ) in both the Dell et al. (Fig. 2b,d, See SI Appendix,  
137 Table S2) and amphibian  $CT_{max}$  (See SI Appendix, Table S3, Fig. S1) datasets. The minimum  
138 acclimation duration in the Seebacher et al. dataset was one week (See SI Appendix, Table S1),

139 and thus it lacked the short acclimation periods necessary for testing effects of both short and  
140 long acclimation durations on acclimation responses.

141         Second, the Gunderson and Stillman dataset also provided information on the heating rate  
142 of  $CT_{max}$  trials, offering another means of testing our hypothesis that time to acclimate is  
143 positively related to body size. If smaller organisms acclimate faster than larger organisms, then  
144 when the heating rate is low, smaller organisms should be more likely to partly or fully acclimate  
145 to the new warmer temperatures during the trials than larger organisms. This would reduce the  
146 ARR, thus diminishing the signal of acclimation more for smaller than larger organisms.  
147 Consistent with this hypothesis, the Gunderson and Stillman dataset revealed that when the  
148 heating rate in  $CT_{max}$  trials was low, smaller organisms failed to show positive ARRs (confidence  
149 interval overlaps with zero on left side of Fig. 2c); in contrast, larger organisms showed positive  
150 ARRs (confidence interval almost never overlaps with zero) at most heating rates (Acc. time x  
151 mass x heat rate:  $X^2=5.27$ ,  $P=0.022$ ; Fig. 2c). Hence, across a diversity of taxa, habitats, and  
152 traits, smaller organisms appear to acclimate more quickly than larger organisms.

153         Given that large organisms appear to take longer to fully acclimate than smaller  
154 organisms, we also tested whether the mean acclimation duration imposed by experimenters  
155 (using the Dell et al. dataset because it had the most acclimation durations) was sufficient to fully  
156 acclimate large organisms (see Methods). In these analyses, acclimation duration was  
157 independent of body size ( $X^2=0.27$ ,  $P=0.598$ ), and the grand mean acclimation duration was only  
158 85 h (or  $5.49 \log_{10} + 1$  seconds; See SI Appendix, Fig. S2), which we show is insufficient to  
159 detect significant acclimation for most large organisms ( $>0.0086$  kg; See SI Appendix, Table  
160 S2).

161



## 162 **Acclimation, body size, and latitude**

163           Given that these initial analyses made it clear that acclimation depends on body size,  
164 acclimation rate, and acclimation duration and first principles suggest that selection for plasticity  
165 should depend on environmental variability<sup>21</sup>, we developed a mathematical model for  
166 acclimation and thermal breadth based on the following assumptions: i) the magnitude of  
167 acclimation depends on an organism's acclimation rate and duration up to some physiological  
168 limit, which increases with latitude<sup>18-20</sup> (also see below), ii) acclimation rate scales  
169 logarithmically with body size and temperature<sup>28</sup> (Fig. 2, See SI Appendix, Table S2 & 3, Fig.  
170 S3), and iii) there is a delay between when organisms are placed at a test temperature and when a  
171 trait is measured. (Methods). Our model is an extension of the seminal theoretical work of  
172 Gabriel and colleagues<sup>21,22</sup> that explored how organisms shift their modes and breadths of  
173 environmental tolerance functions in response to variability in and response lags to  
174 environmental stressors. Specifically, unlike the work of Gabriel and colleagues, our model  
175 addresses the consequences of body size- and latitude-dependent rates and limits to thermal  
176 plasticity on the expression of thermal acclimation and breadth.

177           Our goal of the modeling exercise was to evaluate whether the mathematical model with  
178 only the assumptions above could recreate the salient relationships among acclimation duration,  
179 body size, and latitude observed in the empirical data on acclimation strength and thermal  
180 breadth. If it could, then the principle of parsimony would suggest that seminal theories on  
181 plasticity<sup>21,22</sup> and the metabolic theory of ecology<sup>28,34,35</sup> might indeed accurately predict true  
182 thermal tolerance responses, despite assertions to the contrary<sup>6</sup>. If the model could not recreate  
183 the salient relationships, then it would suggest that thermal plasticity theory was missing  
184 something, as suggested by Angilletta<sup>6</sup>. Although it would be ideal to develop a more

185 sophisticated model that could generate quantitative predictions that were regressed against  
186 observed data, this was outside the scope of the current work.

187         Statistical analyses of our empirical data and our modeling simulations independently  
188 showed that acclimation plasticity declined from mid-latitudes to the tropics as predicted. In the  
189 Seebacher et al. dataset, significant acclimation was detectable for both small and large  
190 organisms at mid-latitudes, but only for large organisms at low latitudes (Fig. 2e, See SI  
191 Appendix, Table S5a,b). Similar patterns were apparent in the Dell et al. (Fig. 3d,e, See SI  
192 Appendix, Table S4) and amphibian  $CT_{\max}$  (See SI Appendix, Table S6, Fig. S4) datasets. The  
193 Gunderson and Stillman dataset also showed the same pattern, although latitude was replaced by  
194 seasonality (standard deviation of annual mean weekly air temperatures; See SI Appendix, Table  
195 S7, Fig. S5), providing support for the hypothesis that the greater capacity to acclimate at mid-  
196 latitudes is a function of greater variability in environmental temperature. Thus, despite smaller  
197 organisms acclimating faster than larger organisms, when acclimation durations are sufficiently  
198 long, larger organisms showed greater acclimation capacity in general, especially in the tropics  
199 where temperature variability is low relative to temperate regions. This result is consistent with  
200 theory that suggests that acclimation capacity should be correlated positively with temperature  
201 variability<sup>21,22</sup> because, at a given latitude, larger organisms should experience greater  
202 temperature variation over their lifetime than smaller organisms because of their generally longer  
203 life spans. Habitat generally did not significantly interact with most predictors, and there were  
204 no consistent effects of habitat on acclimation responses across the datasets (See SI Appendix,  
205 Tables S2-S8).

206         Although we used the Seebacher et al.<sup>20</sup> and Gunderson and Stillman<sup>23</sup> datasets to  
207 identify latitudinal and seasonality gradients in acclimation, the original authors failed to detect

208 such patterns. There are likely several reasons why this occurred, such as not including body  
209 mass data in their analyses, which strongly interacts with both acclimation duration and  
210 latitude/seasonality, and by not weighting their analyses by sample size or variance (see SI  
211 Appendix for additional details). As we show in our conceptual framework (Fig. 1), it is  
212 important to control for methodological variation, trait variation, and their interactions, as well as  
213 correlations among organismal traits, to reliably detect the generally positive association between  
214 environmental variability and acclimation. However, a failure to control for these factors cannot  
215 explain all cases where environmental variability is unrelated to thermal acclimation<sup>24</sup>, and thus  
216 there are exceptions where other factors, such as phylogenetic inertia or epistasis<sup>6</sup>, might place  
217 limits on thermal plasticity for some species.

218 Our simulation model suggests that, in addition to weaker selection for acclimation in the  
219 less thermally variable tropics<sup>18-20</sup>, the apparent weaker acclimation of smaller organisms is a  
220 product of them acclimating so fast that much of their acclimation occurs during the delay  
221 between when they first experience the test temperature and when researchers begin measuring  
222 performance (i.e., an experimental artifact; Fig. 1). This was also supported by experimental  
223 data. Based on the entire Dell et al. dataset (1,480 curves with necessary data for analyses), body  
224 size was associated negatively with acclimation duration ( $F_{1,1478} = 41.92$ ,  $P < 0.001$ , See SI  
225 Appendix, Fig. S6), a methodological pattern that can exaggerate this artifact. For example, very  
226 small organisms, such as microbes, were held at a test temperature for a mean of 8.82 h (the y-  
227 intercept) before a trait was first measured (Fig. 1), which, according to our analyses on time to  
228 acclimate (see Fig. 2), is sufficient time for substantial if not full acclimation for such small  
229 organisms.

230

## 231 **Thermal breadth, body size, and latitude**

232 As with acclimation, both the simulation model and statistical analyses (See SI Appendix,  
233 Table S8) revealed consistent results for thermal breadth. Smaller organisms had greater  
234 breadths than larger organisms (Fig. 3c, f), although this difference was larger at low than mid-  
235 latitudes, at least partly because few large, tropical organisms were tested (Fig. 3f). Species  
236 exhibited an increase in thermal breadth with increasing latitude (latitude x body mass:  
237  $X^2=13.61$ ,  $P<0.001$ ; Fig. 3c, f, See SI Appendix, Table S8), confirming previous results<sup>36</sup>. Our  
238 model suggests that smaller organisms could appear to have greater thermal breadths than larger  
239 organisms because they acclimate more rapidly, maintaining higher observed performances over  
240 a larger range of temperatures (Fig 1, Fig. 4), although fixed responses could also explain some  
241 of this pattern. Additionally, the model highlights that the greater magnitude of acclimation that  
242 occurs at higher latitudes is a possible driver of the positive relationship between thermal  
243 breadths and latitude (Fig. 3c, f)<sup>36</sup>. Importantly, these acclimation and breadth results were  
244 robust to whether symmetric or asymmetric curves were used in the mathematical model (See SI  
245 Appendix) and whether Johnson-Lewin or Weibull models were fit to the thermal performance  
246 curve data (Fig. 3,4 vs SI Appendix, Fig. S7, S8).

247

## 248 **Thermal plasticity, global climate change, and conservation**

249 Our findings also help identify species that might be at risk from GCC (Fig. 1). For  
250 instance, owing to their narrower breadths and longer times to acclimate and evolve adaptations  
251 (Fig. 2,3), our model suggests that larger tropical ectotherms might experience greater lethal and  
252 sublethal effects from GCC than smaller temperate ectotherms. To test these predictions and  
253 thus further validate our model, we used the amphibian  $CT_{max}$  dataset to quantify the relationship

254 between the thermal safety margin ( $CT_{max}$  minus maximum temperature of warmest month at  
255 location of collection)<sup>36,37</sup> of 185 amphibian species – the most threatened vertebrate taxon on  
256 the planet<sup>4</sup> – and their IUCN (International Union for the Conservation of Nature) threat status,  
257 controlling for various additional factors (see Methods). As our model predicted, large tropical  
258 amphibian species (with small geographic ranges; species with large ranges were rarely  
259 threatened regardless of body size or latitude, See SI Appendix, Fig. S9) had the strongest  
260 negative relationship between threat status and thermal safety margin and thus are indeed most  
261 threatened by GCC (Fig. 5a,b). Also, as predicted, this threat level decreased as latitude  
262 increased or body size decreased (interaction:  $X^2=8.66$ ,  $P=0.0033$ ; Fig. 5a,b). Importantly, this  
263 relationship between threat status and thermal safety margin was detectable despite the many  
264 factors other than GCC contributing to amphibian declines<sup>14,38,39</sup>.

265 This analysis, however, does not specifically evaluate the contribution of acclimation  
266 plasticity to threat status. To do this, we re-analyzed the same dataset using the subset of  
267 amphibian species for which we also had thermal acclimation plasticity data (ARR; 74 species),  
268 testing for interactions among safety margin, ARR, body size, and latitude, and controlling for  
269 the local level of climate change (See SI Appendix, Table S9). Not surprisingly, acclimation  
270 plasticity reduced threat status the most (i.e., was the most protective) when the safety margin  
271 was small (Fig. 5c,d), highlighting the protective nature of acclimation plasticity to GCC. In  
272 fact, the slope between ARR and threat status was never significantly negative at large safety  
273 margins (See SI Appendix, Table S9). The biggest difference in threat status between large and  
274 small amphibians occurred at low latitudes (Fig. 5a,b). If differential plasticity contributed to  
275 this threat status pattern, then the greatest difference between large and small amphibians in the  
276 protectiveness of plasticity against GCC (i.e., slope between threat status and ARR) should also

277 occur at low latitudes. The relationship between threat status and ARR became more negative as  
278 body size decreased and was similar for large and small amphibians in temperate regions.  
279 However, the same ARR at low latitudes reduced the threat status (was less protective) of larger  
280 amphibians less than smaller ones (Fig. 5c,d); and thus, as predicted, the greatest difference  
281 between large and small amphibians in the protectiveness of plasticity against GCC occurred at  
282 low latitudes. This is likely because most  $CT_{max}$  studies ignore time to acclimate. Because  
283 smaller organisms acclimate sooner than larger organisms, even with the same ARRs, smaller  
284 organisms pay the costs of their physiology mismatching their environment for a shorter period  
285 of time. Overall, these results suggest that variation in thermal acclimation abilities might partly  
286 account for why amphibians experience a greater threat from GCC as body size increases and  
287 latitude decreases.

288

## 289 **Conclusions**

290 Here we demonstrate that methodological factors, body mass, and latitude interact to  
291 shape the actual and perceived thermal acclimation responses of ectotherms. Our relatively  
292 simple mathematical model with only a few assumptions recreated the complex patterns of  
293 acclimation observed in four independent and diverse datasets consisting of experiments  
294 conducted across acclimation durations, body masses, habitats, traits, latitudes, and >500 species.  
295 Although we were unable to test the hypothesis that acclimation rate should scale with body size  
296 to the  $\frac{1}{4}$  power, our model assumed this and its output was consistent with the extensive  
297 experimental data, findings congruent with the metabolic theory of ecology<sup>28,34,35</sup>. Additionally,  
298 our model and the experimental data suggest that the shorter times to acclimate of smaller than  
299 larger organisms drive the generally observed wider thermal breadths of smaller organisms (Fig.

300 4). Importantly, our findings are consistent across all four datasets, despite various strengths and  
301 limitations of each dataset. One of these datasets contained thermal optima, providing evidence  
302 that thermal optima seem to regularly acclimate despite assertions to the contrary<sup>6</sup>. Although  
303 other factors undoubtedly affect thermal acclimation and breadth, our results suggest we are  
304 capturing many of the principal mechanisms driving variation in acclimation and breadth across  
305 the globe and species (but see caveats, including discussion of cold acclimation, in SI Appendix).  
306 By demonstrating that acclimation abilities are greater for larger than smaller organisms and  
307 decline from temperate to tropical regions, that thermal breadths are inversely correlated with  
308 body size, and that much of the previous controversy<sup>6,8,20,23</sup> regarding these relationships was a  
309 product of insufficiently accounting for methodological factors and important statistical  
310 interactions, we believe that we have offered the first synthesis of thermal tolerance responses to  
311 be entirely consistent with theory on thermal plasticity and metabolic rates. Additionally, given  
312 that body mass is strongly correlated with generation time and latitude is strongly correlated with  
313 diel variation, our findings have potential to be extended to these other common predictors of  
314 thermal acclimation<sup>40</sup>.

315 Our model identifies large tropical ectothermic species at particular risk from GCC,  
316 which was validated by evidence that large tropical amphibians already experience a greater  
317 threat from GCC than any other tested amphibian group. Our assertion that tropical ectothermic  
318 species should be more sensitive to GCC than temperate species is consistent with previous  
319 studies<sup>36</sup>, and our assertion that larger organisms should be more sensitive to GCC than smaller  
320 organisms is consistent with GCC reducing the body sizes of aquatic organisms<sup>26,31</sup>, temperature  
321 variability benefiting pathogens (small-bodied) more so than hosts (large-bodied), and recent  
322 disease emergences being linked to GCC<sup>11,13,41</sup>. Moreover, our results suggest that global

323 warming might generally give smaller species an edge in species interactions, resulting in  
324 asymmetries in species interactions<sup>42,43</sup> that likely have significant consequences for community  
325 composition and ecosystem functions<sup>7,44</sup>.

326         Although previous research has often failed to detect acclimation in small organisms<sup>18-20</sup>,  
327 suggesting they might be at increased risk from GCC, our empirical and modeling results reveal  
328 that many small organisms, especially those at high latitudes, are indeed capable of rapid  
329 acclimation and because of this rapid acclimation, they have broad apparent thermal breadths.  
330 To date, much of this acclimation has apparently gone undetected because of low heating rates in  
331  $CT_{max}$  studies and delays in performance measurements that typify most experiments, or has been  
332 underestimated because most thermal plasticity studies ignore acclimation rates, which appear to  
333 be shorter for smaller organisms. Our results also suggest that researchers may be  
334 underestimating the plasticity of large organisms because many experiments do not provide  
335 sufficient time for them to fully acclimate to new temperatures. These results, coupled with many  
336 forecasts of GCC-induced extinctions not including behavioral or physiological (i.e.,  
337 acclimation) plasticity to temperature<sup>45,46</sup>, suggest that some studies might have overestimated  
338 the risks of GCC to ectothermic animals. Recently, researchers came to similar conclusions for  
339 plants<sup>7</sup>. Such conclusions should not be taken as evidence that effects of GCC will not be  
340 catastrophic; however, it is at least a rare, albeit thin, silver lining in research on the effects of  
341 GCC on biodiversity. By providing a mechanistic understanding of acclimation based on  
342 geographic and species traits that are easily measured or inferred (i.e., latitude, ecto- vs  
343 endotherm, body size), we have provided an advance towards a framework for quantitatively  
344 predicting which ectothermic species and locations on the planet are most vulnerable to GCC,  
345 which should facilitate targeting limited conservation resources.



346

## 347 **Methods**

### 348 Data compilation

349 We tested our hypotheses about thermal acclimation and breadth using four independent  
350 datasets. The first and second datasets were compiled and described by Seebacher et al.<sup>20</sup> and  
351 Gunderson and Stillman<sup>23</sup> and offer 651 and 288 ARR from studies with at least two  
352 acclimation temperatures, respectively. These datasets were reduced to 333 and 215 cases,  
353 respectively, with complete information and additional criteria applied (See SI Appendix, Table  
354 S1). The third database contains 2,445 thermal response curves of diverse performance traits  
355 ranging from feeding rate to body velocity<sup>32,33</sup>, to which we added data on acclimation  
356 temperatures and times (see below). The methods used to obtain and standardize these data are  
357 fully described in Dell et al.<sup>32,33</sup>. For some of our analyses, sample size was reduced to 128 of  
358 the 2,445 thermal responses (and 19 traits) for which there were non-monotonic performance  
359 curves (which are necessary to estimate optimal temperature,  $T_{opt}$ ) and acclimation temperature,  
360 location, and mass data. The fourth dataset consists of 1,040 estimates of  $CT_{max}$  for 251  
361 amphibian species. Given that amphibians can show considerable variation in body mass from  
362 water uptake or dehydration, we used snout-vent length as our body size estimate for this dataset.

363

### 364 Estimation of thermal response parameters

365 To calculate the parameters of each intraspecific thermal response in the Dell et al. dataset (i.e.,  
366  $T_{opt}$ , curve height, and breadth), we used the *bbmle* package in R to fit unimodal functions to all  
367 non-monotonic temperature performance curves (those where the minimum tested temperature <  
368  $T_{opt}$  < maximum tested temperature) with at least 5 points and assuming Gaussian distributed

369 errors. We used Johnson-Lewin (Eq. 1)<sup>32,33</sup> and Weibull (Eq. 2)<sup>6</sup> functions to fit the thermal  
370 performance curves because both can fit asymmetrical curves without falling below zero on the  
371 y-axis (see SI Appendix for additional details). We eliminated fits where  $T_{opt}$  was outside of the  
372 range of temperatures tested. We calculated thermal breadths as the width of each thermal  
373 performance curve at 75% of the maximum height ( $T_{opt}$ ). Because breadth measurements that  
374 exceed the range of tested temperatures are unreliable, we excluded 13 cases where this  
375 occurred, resulting in a final sample size of 107.

376

### 377 Overview of the mathematical model

378 Our model of thermal reaction norms (Fig. 4) assumed that: i) all organisms possess a  
379 common (identically broad) Gaussian (symmetric) or Weibull (asymmetric) thermal performance  
380 curve with a  $T_{opt}$  that depends on their latitude, ii) organisms acclimate to test temperatures that  
381 differ from their thermal optimum by translating (i.e., sliding) their thermal performance curves  
382 along the temperature axis, iii) the magnitude of acclimation depends on the organism's  
383 acclimation rate and the acclimation duration up to some physiological limit of maximum  
384 acclimation, iv) acclimation rate scales allometrically with body mass and test temperature, and  
385 v) maximum acclimation depends linearly on absolute latitude. To generate predictions for the  
386 relationships among body size, latitude, acclimation, and performance breadth, we first simulated  
387 a pre-experiment laboratory acclimation period and then simulated an experiment in which 1,000  
388 species were collected from various locations, acclimated to a given temperature in the  
389 laboratory for a fixed amount of time, and then performance was assessed across a temperature  
390 gradient. We assumed that organisms were allowed to acclimate to these experimental  
391 temperatures for a period of time that was shorter than the pre-experiment laboratory acclimation

392 duration. Using the performance data simulated for each species at each temperature, we fitted  
393 Gaussian and Weibull thermal performance curves for each species using the *nls* function in the  
394 *stats* package in R. We then extracted parameters for  $T_{\text{opt}}$  and breadth (as the parameter  $c$ ) from  
395 the Gaussian fits, and numerically computed these quantities, with breadth defined as the range  
396 over which organismal performance was  $\geq 75\%$  of peak performance, for the Weibull fits. We  
397 then analyzed these data with models that paralleled those used for the real dataset. See Methods  
398 in the SI Appendix for additional details.

399

#### 400 Statistical analyses

401 To test for effects of duration of time held at an acclimation temperature, we used the *lme*  
402 function in the *nlme* package of R statistical software to conduct a weighted mixed effects  
403 analysis (weighting by sample size and treating the study and species combination as a random  
404 effect) with  $T_{\text{opt}}$  or  $CT_{\text{max}}$  as the Gaussian response variables, habitat, trophic assignment ( $T_{\text{opt}}$   
405 only), and life stage ( $CT_{\text{max}}$  only) as categorical moderators, and acclimation temperature, log  
406 acclimation duration, absolute value of latitude, and log body size as crossed continuous  
407 predictors (two- and three-way interactions only). To evaluate whether acclimation durations in  
408 our datasets were sufficient to acclimate large organisms, we repeated the acclimation duration  
409 analyses except we treated log acclimation duration as a response variable and excluded  
410 interactions.

411 To test the predictions of our mathematical model, we repeated the acclimation time  
412 analyses described above except we included all effect sizes where acclimation temperature data  
413 were available (see Tables S4-7 for details). For the Seebacher et al. analyses, our measure of  
414 acclimation strength was  $\log(|1 - \text{Post-acclimation thermal sensitivity}| + 0.001)^{-1}$ . Post-

415 acclimation thermal sensitivity was quantified in Seebacher et al.<sup>20</sup> as a  $Q_{10}$  value where 1  
416 indicates that physiological rates do not change with a change in acclimation temperatures.  
417 Thus, according to Seebacher et al.<sup>20</sup> “the closer  $Q_{10}$  is to 1, the less affected animal physiology  
418 will be to a change in environmental temperature, meaning that animals will be more resilient to  
419 climate change”. Hence, because the direction of the change in a physiological rate will depend  
420 on the trait (e.g. swimming speed, metabolic rate, etc.), we took the absolute value of the  
421 deviation from 1. The log transformation was used to normalize the variable and multiplying by  
422 -1 resulted in more positive values intuitively indicating stronger acclimation. Results did not  
423 differ if we conducted analyses on both *in situ* and *ex situ* measurements (See SI Appendix,  
424 Table S5a) or on *in situ* whole body measurements only (See SI Appendix, Table S5b). Thus,  
425 we focus on analyses conducted on both *in situ* and *ex situ* measurements because it provided the  
426 larger sample size. For the Gunderson and Stillman analyses, ARR was the response variable  
427 and seasonality replaced latitude as a predictor. We then repeated these analyses on the breadth  
428 measurements from Dell et al.’s thermal performance curve dataset, again employing weighted  
429 mixed effect regression. To quantify the relationship between log body size and the time  
430 organisms were held at a test temperature before trait measurements were taken, we conducted a  
431 simple regression analysis using 1,480 of the 2,445 thermal response curves that had these data  
432 available. To validate our model of thermal acclimation and breadth, we treated amphibian  
433 species as the replicate (using the mean  $CT_{max}$  for each species) in the amphibian  $CT_{max}$  dataset,  
434 IUCN threat status as a binomial response variable, thermal safety margin, log body size,  
435 absolute value of latitude, log elevation, and log range size as crossed predictors, and a local  
436 estimate of the magnitude of climate change as a covariate (slope of the previous 50 years of  
437 maximum temperatures). To evaluate the contribution of acclimation plasticity to amphibian

438 threat status, we analyzed the subset of amphibian  $CT_{max}$  data for which we also had ARR  
439 measurements, treating the magnitude of local climate change and log elevation as a covariates,  
440 and thermal safety margin, log body size, absolute value of latitude, and log ARR as crossed  
441 predictors. For all analyses, we chose not to include additional predictors that are included in  
442 some other acclimation studies, such as generation time and diel variation<sup>6,40</sup>. Specifically, we  
443 did not include generation time because it is highly collinear with log body size. We chose not  
444 to include diel variation because it is correlated with latitude and interacts with season. Because  
445 of this interaction and several studies not providing time of year of their collections, our sample  
446 sizes would have been further reduced if diel variation was included.

447       Where possible, we employed a multimodel inference approach (*dredge* and *model.avg*  
448 functions in the *MuMIn* package) to ensure we were not drawing conclusions based solely on one  
449 model. Multimodel inference compares all possible models using AIC and generates weighted  
450 coefficients and relative importance scores for predictors. We calculated conditional  $R^2$  values  
451 (variance explained by both fixed and random effects) for the best model where possible<sup>47</sup>,  
452 otherwise we calculated a  $R^2$  for the correlation between fitted and observed values. Analyses on  
453  $T_{opt}$  and thermal breadth were conducted on both Johnson-Lewin and Weibull estimates of these  
454 parameters. For all analyses, log-likelihood ratio tests using the *Anova* function in the *car*  
455 package of R statistical software were used to calculate the probability values for each effect of  
456 the best performing model (i.e., lowest AIC). To display results of our regression models, we  
457 generated partial residual plots from the best model based on AIC using the *visreg* function in the  
458 *visreg* package of R statistical software. In all partial residual plots, continuous predictors are  
459 discretized strictly for the purposes of visually displaying statistical interactions (see SI

460 Appendix for additional details). To ensure transparency, all datasets and code to reproduce the  
461 statistical analyses and figures are provided in a supplemental file.

462

#### 463 Data Accessibility

464 Data used for analyses in this manuscript can be found at <http://biotraits.ucla.edu/>,  
465 <http://www.esapubs.org/archive/ecol/E094/108/>, or in Database 1, which is an Excel file with 19  
466 worksheets. One worksheet is the R code used to produce the figures and Tables in the paper.  
467 Nine of the remaining 18 worksheets are the datasets used for specific analyses in the paper. The  
468 remaining nine worksheets are the metadata that accompany each of the nine datasets.

469

#### 470 **Acknowledgements**

471 We thank S. Pawar, V. Savage, B. Garcia-Carreras, D. Kontopoulos, T. Smith, and an  
472 anonymous reviewer for helpful discussion or comments that improved this manuscript. This  
473 research was supported by grants from the National Science Foundation (EF-1241889, EID-  
474 1518681, EF-1241848), National Institutes of Health (R01GM109499, R01TW010286,  
475 F32AI112255), US Department of Agriculture (NRI 2006-01370, 2009-35102-0543), and US  
476 Environmental Protection Agency (CAREER 83518801) to J.R.R.

477

#### 478 **References**

479 1 Dietz, T. J. & Somero, G. N. The threshold induction temperature of the 90-kDA heat-  
480 shock protein is subject to acclimatization in eurythermal goby fishes (genus *Gillichthys*).  
481 *P. Natl. Acad. Sci. USA* **89**, 3389-3393, doi:10.1073/pnas.89.8.3389 (1992).

- 482 2 Terblanche, J. S., Sinclair, B. J., Klok, C. J., McFarlane, M. L. & Chown, S. L. The  
483 effects of acclimation on thermal tolerance, desiccation resistance and metabolic rate in  
484 *Chirodica chalconota* (Coleoptera : Chrysomelidae). *J. Insect Physiol.* **51**, 1013-1023,  
485 doi:10.1016/j.jinsphys.2005.04.016 (2005).
- 486 3 Raffel, T. R., Rohr, J. R., Kiesecker, J. M. & Hudson, P. J. Negative effects of changing  
487 temperature on amphibian immunity under field conditions. *Funct. Ecol.* **20**, 819-828  
488 (2006).
- 489 4 Raffel, T. R. *et al.* Disease and thermal acclimation in a more variable and unpredictable  
490 climate. *Nat. Clim. Chang.* **3**, 146-151 (2013).
- 491 5 Kingsolver, J. G. & Huey, R. B. Evolutionary analyses of morphological and  
492 physiological plasticity in thermally variable environments. *Am. Zool.* **38**, 545-560  
493 (1998).
- 494 6 Angilletta, M. J. *Thermal adaptation: a theoretical and empirical synthesis.* (Oxford  
495 University Press, 2009).
- 496 7 Reich, P. B. *et al.* Boreal and temperate trees show strong acclimation of respiration to  
497 warming. *Nature* **531**, 633-636, doi:doi:10.1038/nature17142 (2016).
- 498 8 Woods, H. A., Harrison, J. F. & Merilä, J. Interpreting rejections of the beneficial  
499 acclimation hypothesis: when is physiological plasticity adaptive? *Evolution* **56**, 1863-  
500 1866 (2002).
- 501 9 Huey, R. B., Berrigan, D., Gilchrist, G. W. & Herron, J. C. Testing the adaptive  
502 significance of acclimation: A strong inference approach. *Am. Zool.* **39**, 323-336 (1999).
- 503 10 Lutterschmidt, W. I. & Hutchison, V. H. The critical thermal maximum: history and  
504 critique. *Can. J. Zool.-Rev. Can. Zool.* **75**, 1561-1574, doi:10.1139/z97-783 (1997).

- 505 11 Sinervo, B. *et al.* Erosion of lizard diversity by climate change and altered thermal  
506 niches. *Science* **328**, 894-899, doi:10.1126/science.1184695 (2010).
- 507 12 DeWitt, T. J., Sih, A. & Wilson, D. S. Costs and limits of phenotypic plasticity. *Trends in*  
508 *ecology & evolution* **13**, 77-81 (1998).
- 509 13 Rohr, J. R. *et al.* Frontiers in climate change-disease research. *Trends Ecol. Evol.* **26**,  
510 270-277 (2011).
- 511 14 Rohr, J. R. & Raffel, T. R. Linking global climate and temperature variability to  
512 widespread amphibian declines putatively caused by disease. *P. Natl. Acad. Sci. USA*  
513 **107**, 8269-8274 (2010).
- 514 15 Somero, G. N. The physiology of climate change: how potentials for acclimatization and  
515 genetic adaptation will determine 'winners' and 'losers'. *J. Exp. Biol.* **213**, 912-920,  
516 doi:10.1242/jeb.037473 (2010).
- 517 16 Huey, R. B. *et al.* Predicting organismal vulnerability to climate warming: roles of  
518 behaviour, physiology and adaptation. *Philos. Trans. R. Soc. B-Biol. Sci.* **367**, 1665-1679,  
519 doi:10.1098/rstb.2012.0005 (2012).
- 520 17 Vasseur, D. A. *et al.* Increased temperature variation poses a greater risk to species than  
521 climate warming. *Proc. R. Soc. Lond. Ser. B-Biol. Sci.* **281**, doi:10.1098/rspb.2013.2612  
522 (2014).
- 523 18 Feder, M. E. Environmental variability and thermal acclimation of metabolism in tropical  
524 anurans. *J. Therm. Biol.* **7**, 23-28, doi:10.1016/0306-4565(82)90015-8 (1982).
- 525 19 Kolbe, J. J., Ehrenberger, J. C., Moniz, H. A. & Angilletta, M. J. Physiological variation  
526 among invasive populations of the brown anole (*Anolis sagrei*). *Physiol. Biochem. Zool.*  
527 **87**, 92-104, doi:10.1086/672157 (2014).



- 528 20 Seebacher, F., White, C. R. & Franklin, C. E. Physiological plasticity increases resilience  
529 of ectothermic animals to climate change. *Nat. Clim. Chang.* **5**, 61-66,  
530 doi:10.1038/nclimate2457 (2015).
- 531 21 Gabriel, W., Luttbeg, B., Sih, A. & Tollrian, R. Environmental tolerance, heterogeneity,  
532 and the evolution of reversible plastic responses. *The American Naturalist* **166**, 339-353  
533 (2005).
- 534 22 Gabriel, W. & Lynch, M. The selective advantage of reaction norms for environmental  
535 tolerance. *J. Evol. Biol.* **5**, 41-59 (1992).
- 536 23 Gunderson, A. R. & Stillman, J. H. Plasticity in thermal tolerance has limited potential to  
537 buffer ectotherms from global warming. *Proc. R. Soc. Lond. Ser. B-Biol. Sci.* **282**,  
538 doi:10.1098/rspb.2015.0401 (2015).
- 539 24 Brown, J. H. & Feldmeth, C. R. Evolution in constant and fluctuating environments:  
540 thermal tolerances of desert pupfish (*Cyprinodon*). *Evolution*, 390-398 (1971).
- 541 25 Blackburn, T. M., Gaston, K. J. & Loder, N. Geographic gradients in body size: a  
542 clarification of Bergmann's rule. *Divers. Distrib.* **5**, 165-174 (1999).
- 543 26 Horne, C. R., Hirst, A. & Atkinson, D. Temperature-size responses match latitudinal-size  
544 clines in arthropods, revealing critical differences between aquatic and terrestrial species.  
545 *Ecol. Lett.* **18**, 327-335 (2015).
- 546 27 Makarieva, A. M., Gorshkov, V. G. & Li, B.-L. Gigantism, temperature and metabolic  
547 rate in terrestrial poikilotherms. *Proceedings of the Royal Society of London B:*  
548 *Biological Sciences* **272**, 2325-2328 (2005).
- 549 28 Brown, J. H., Gillooly, J. F., Allen, A. P., Savage, V. M. & West, G. B. Toward a  
550 metabolic theory of ecology. *Ecology* **85**, 1771-1789 (2004).

- 551 29 Kingsolver, J. G. & Huey, R. B. Size, temperature, and fitness: three rules. *Evol. Ecol.*  
552 *Res.* **10**, 251-268 (2008).
- 553 30 Kolbe, J. J., VanMiddlesworth, P. S., Losin, N., Dappen, N. & Losos, J. B. Climatic  
554 niche shift predicts thermal trait response in one but not both introductions of the Puerto  
555 Rican lizard *Anolis cristatellus* to Miami, Florida, USA. *Ecol. Evol.* **2**, 1503-1516,  
556 doi:10.1002/ece3.263 (2012).
- 557 31 Daufresne, M., Lengfellner, K. & Sommer, U. Global warming benefits the small in  
558 aquatic ecosystems. *P. Natl. Acad. Sci. USA* **106**, 12788-12793,  
559 doi:10.1073/pnas.0902080106 (2009).
- 560 32 Dell, A. I., Pawar, S. & Savage, V. M. The thermal dependence of biological traits.  
561 *Ecology* **94**, 1205–1206 (2013).
- 562 33 Dell, A. I., Pawar, S. & Savage, V. M. Systematic variation in the temperature  
563 dependence of physiological and ecological traits. *P. Natl. Acad. Sci. USA* **108**, 10591-  
564 10596, doi:10.1073/pnas.1015178108 (2011).
- 565 34 Gillooly, J. F., Brown, J. H., West, G. B., Savage, V. M. & Charnov, E. L. Effects of size  
566 and temperature on metabolic rate. *Science* **293**, 2248-2251 (2001).
- 567 35 Gillooly, J. F., Charnov, E. L., West, G. B., Savage, V. M. & Brown, J. H. Effects of size  
568 and temperature on developmental time. *Nature* **417**, 70-73 (2002).
- 569 36 Deutsch, C. A. *et al.* Impacts of climate warming on terrestrial ectotherms across latitude.  
570 *P. Natl. Acad. Sci. USA* **105**, 6668-6672, doi:10.1073/pnas.0709472105 (2008).
- 571 37 Sunday, J. M. *et al.* Thermal-safety margins and the necessity of thermoregulatory  
572 behavior across latitude and elevation. *P. Natl. Acad. Sci. USA* **111**, 5610-5615,  
573 doi:10.1073/pnas.1316145111 (2014).

- 574 38 Wake, D. B. & Vredenburg, V. T. Are we in the midst of the sixth mass extinction? A  
575 view from the world of amphibians. *P. Natl. Acad. Sci. USA* **105**, 11466-11473,  
576 doi:10.1073/pnas.0801921105 (2008).
- 577 39 Rohr, J. R., Raffel, T. R., Romansic, J. M., McCallum, H. & Hudson, P. J. Evaluating the  
578 links between climate, disease spread, and amphibian declines. *P. Natl. Acad. Sci. USA*  
579 **105**, 17436-17441 (2008).
- 580 40 Angilletta, M. J. *et al.* Coadaptation: A unifying principle in evolutionary thermal  
581 biology. *Physiol. Biochem. Zool.* **79**, 282-294, doi:10.1086/499990 (2006).
- 582 41 Cohen, J. M. *et al.* Spatial scale modulates the strength of ecological processes driving  
583 disease distributions. *P. Natl. Acad. Sci. USA* **113**, E3359-E3364,  
584 doi:10.1073/pnas.1521657113 (2016).
- 585 42 Dell, A. I., Pawar, S. & Savage, V. M. Temperature dependence of trophic interactions  
586 are driven by asymmetry of species responses and foraging strategy. *J. Anim. Ecol.* **83**,  
587 70-84, doi:10.1111/1365-2656.12081 (2014).
- 588 43 Cohen, J. M. *et al.* The thermal mismatch hypothesis explains host susceptibility to an  
589 emerging infectious disease. *Ecol. Lett.* **20**, 184-193 (2017).
- 590 44 Parmesan, C. Ecological and evolutionary responses to recent climate change. *Annu. Rev.*  
591 *Ecol. Evol. Syst.* **37**, 637-669, doi:10.1146/annurev.ecolsys.37.091305.110100 (2006).
- 592 45 Urban, M. Accelerating extinction risk from climate change. *Science* **348**, 571-573  
593 (2015).
- 594 46 Thomas, C. D. *et al.* Extinction risk from climate change. *Nature* **427**, 145-148,  
595 doi:10.1038/nature02121 (2004).

596 47 Nakagawa, S. & Schielzeth, H. A general and simple method for obtaining  $R^2$  from  
597 generalized linear mixed-effects models. *Methods Ecol. Evol.* **4**, 133-142 (2013).

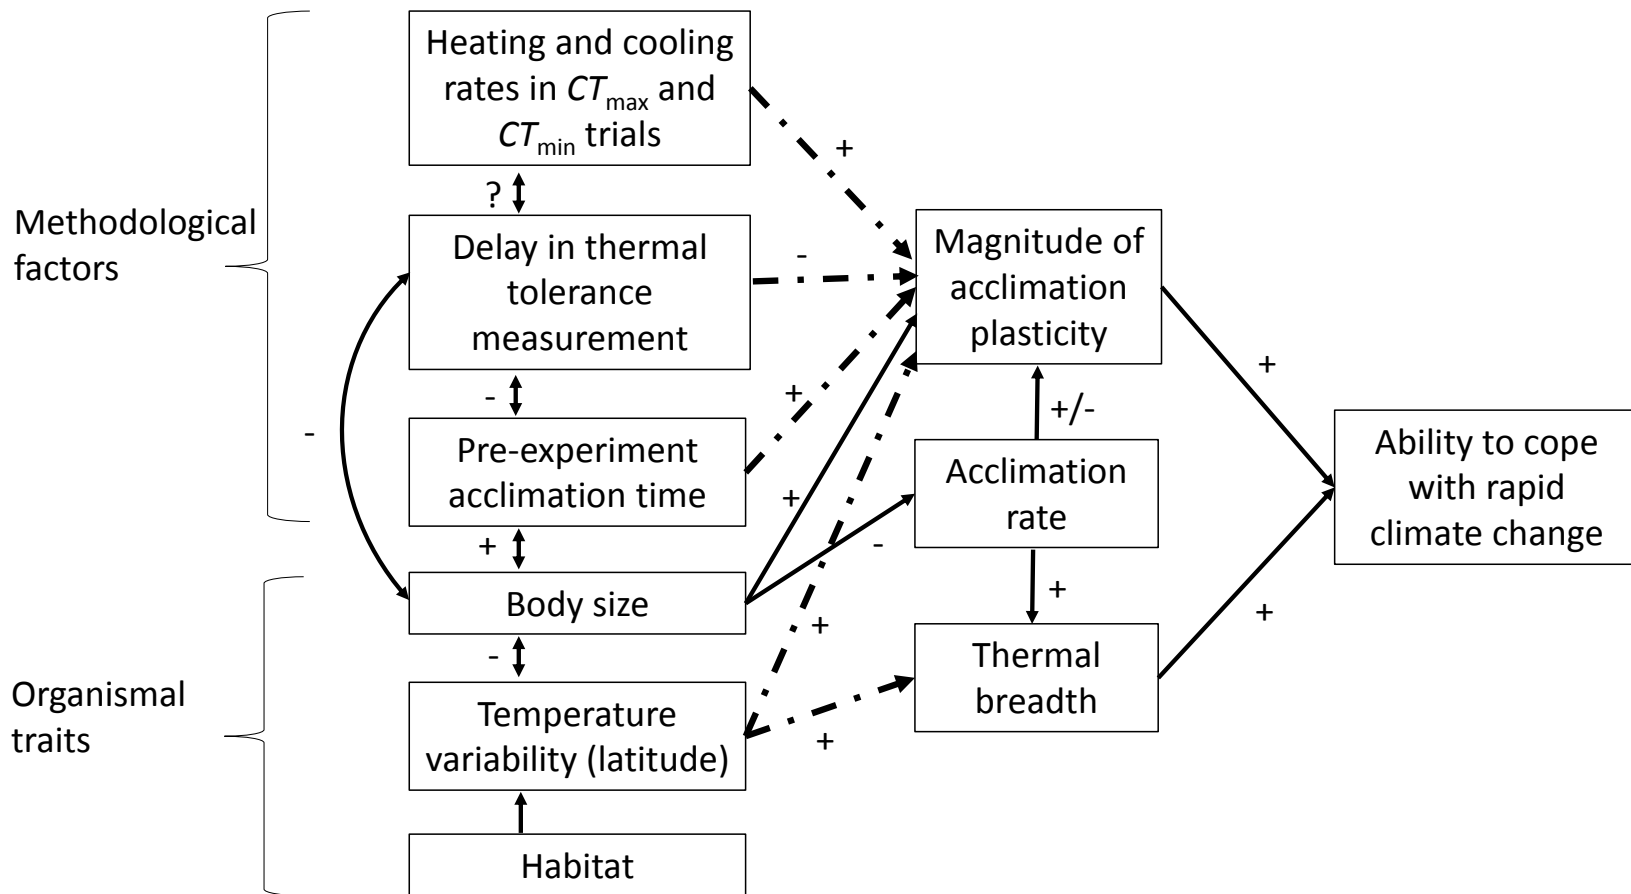

**Figure 1 | Conceptual model for how variation in methodologies and organismal traits affect the apparent ability of ectothermic organisms to cope with rapid climate change through acclimation plasticity and thermal breadth.** Positive and negative signs next to arrows signify the hypothesized direction of the relationship, bidirectional arrows represent correlations because the cause-effect relationship might be unclear, and dashed arrows are effects that are hypothesized to interact statistically with organismal body size, emphasizing the considerable dependence of both acclimation and breadth on body size. This conceptual model highlights the need to more thoroughly account for methodological variation, trait variation, and their interactions to better understand acclimation and thermal breadth, as well as their relationship to coping with rapid climate change. See the primary text for a more thorough discussion of this conceptual figure.

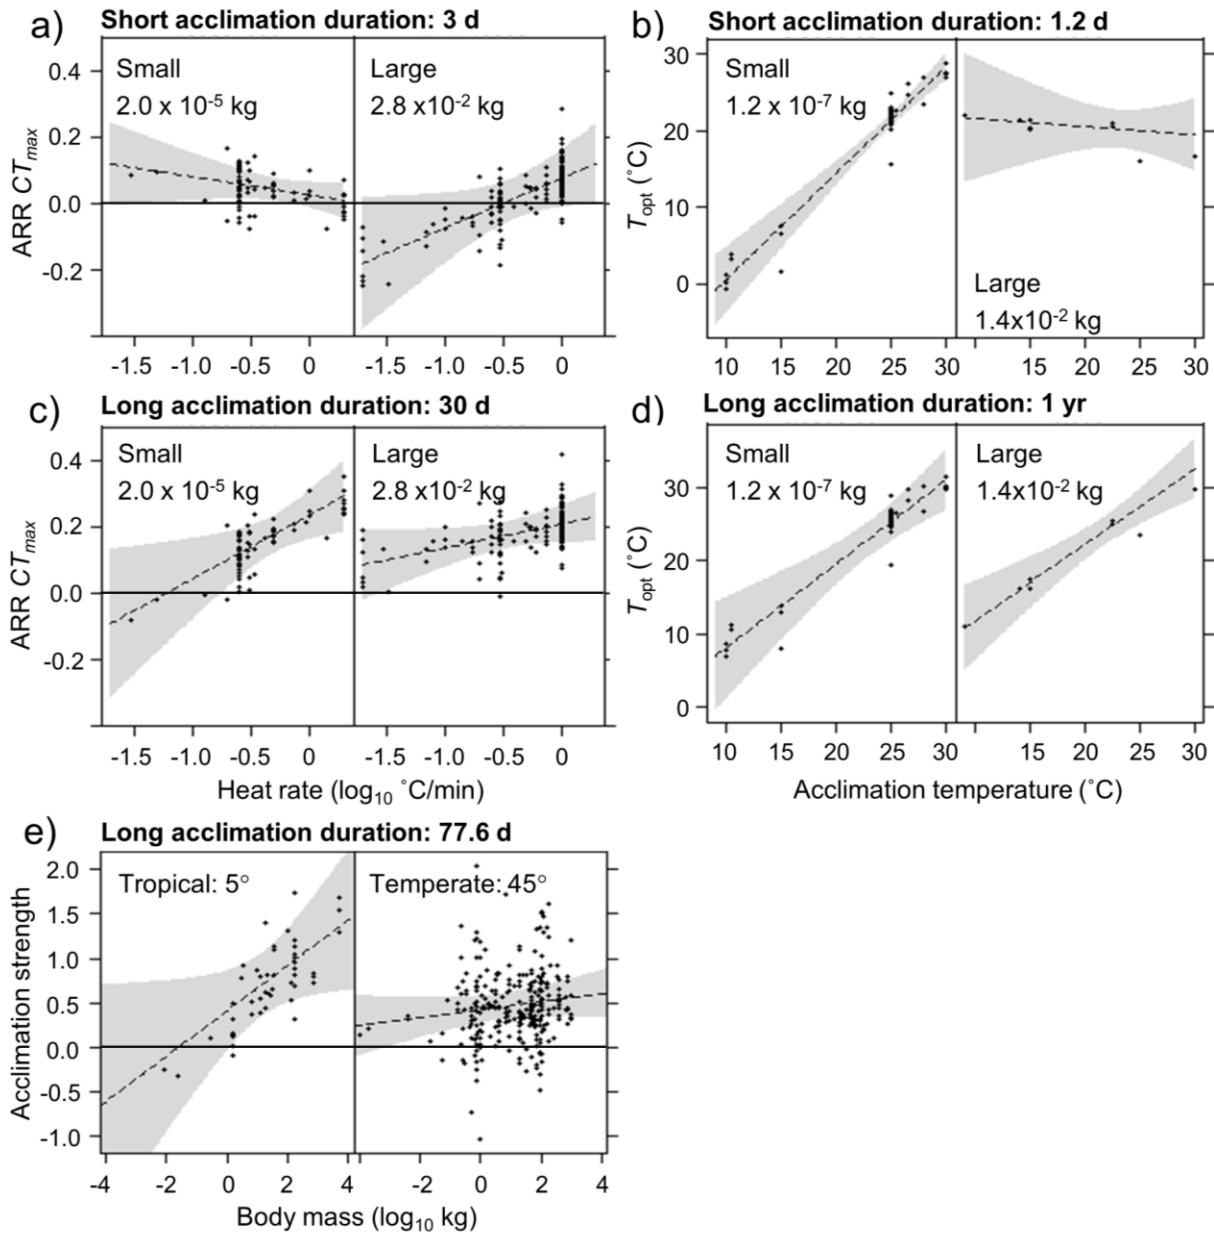

**Figure 2 | Partial residual plots showing that small organisms acclimate faster than larger organisms (a-d) and that acclimation abilities depend on an interaction between latitude and body size (e).** Partial residual plots hold all factors in the statistical model that are not being displayed constant (see SI Appendix “Supplementary Discussion: Details on the visreg package”). Acclimation was measured as the acclimation response ratio (ARR) which is the correlation between acclimation temperature and critical thermal maximum ( $CT_{max}$ ; **a** & **c**) or optimal performance temperature ( $T_{opt}$ ; **b** & **d**). See “Methods: Statistical analyses” for the measure of acclimation strength from Seebacher et al. (2) used in **e**). When acclimation durations are short, only smaller organisms show a positive mean ARR (**a**; i.e., they acclimate) or positive slope **b**) (see same result in See SI Appendix, Fig. S3), but when acclimation durations are long, both small and large organisms show acclimation responses (**c** & **d**;  $T_{opt}$  three-way interaction:

$X^2=10.23$ ,  $P=0.001$ ,  $n=60$ ; range of absolute value of latitudes 25-57°). Similarly, when acclimation durations are long, small organisms do not show positive ARR when the heating rate in  $CT_{max}$  trials is low (presumably because they are at least partly acclimating to the new warmer temperatures during the trial), whereas large organisms show positive ARRs at most heating rates (**c**; heat rate x size x duration:  $X^2=4.47$ ,  $P=0.0345$ ,  $n=262$ ). Subpanels represent different body size categories (breaks based on 50<sup>th</sup> and 90<sup>th</sup> percentiles and 20<sup>th</sup> and 80<sup>th</sup> for  $T_{opt}$  and  $CT_{max}$ , respectively; see SI Appendix “Supplementary Discussion: Details on the visreg package”) and short and long acclimation is represented by 20<sup>th</sup> and 80<sup>th</sup> percentiles. Despite smaller organisms acclimating faster than larger organisms, when acclimation durations were long (conditioned on 77.6 d, the 80<sup>th</sup> percentile), large organisms showed greater acclimation capacity in general, but especially in the tropics (**e**; Latitude\*mass:  $z = 2.18$ ,  $P = 0.029$ ). This result matches the findings from the two other datasets (see Fig. 3 and See SI Appendix, Fig. S4-5). Gray shading shows associated 95% confidence bands.

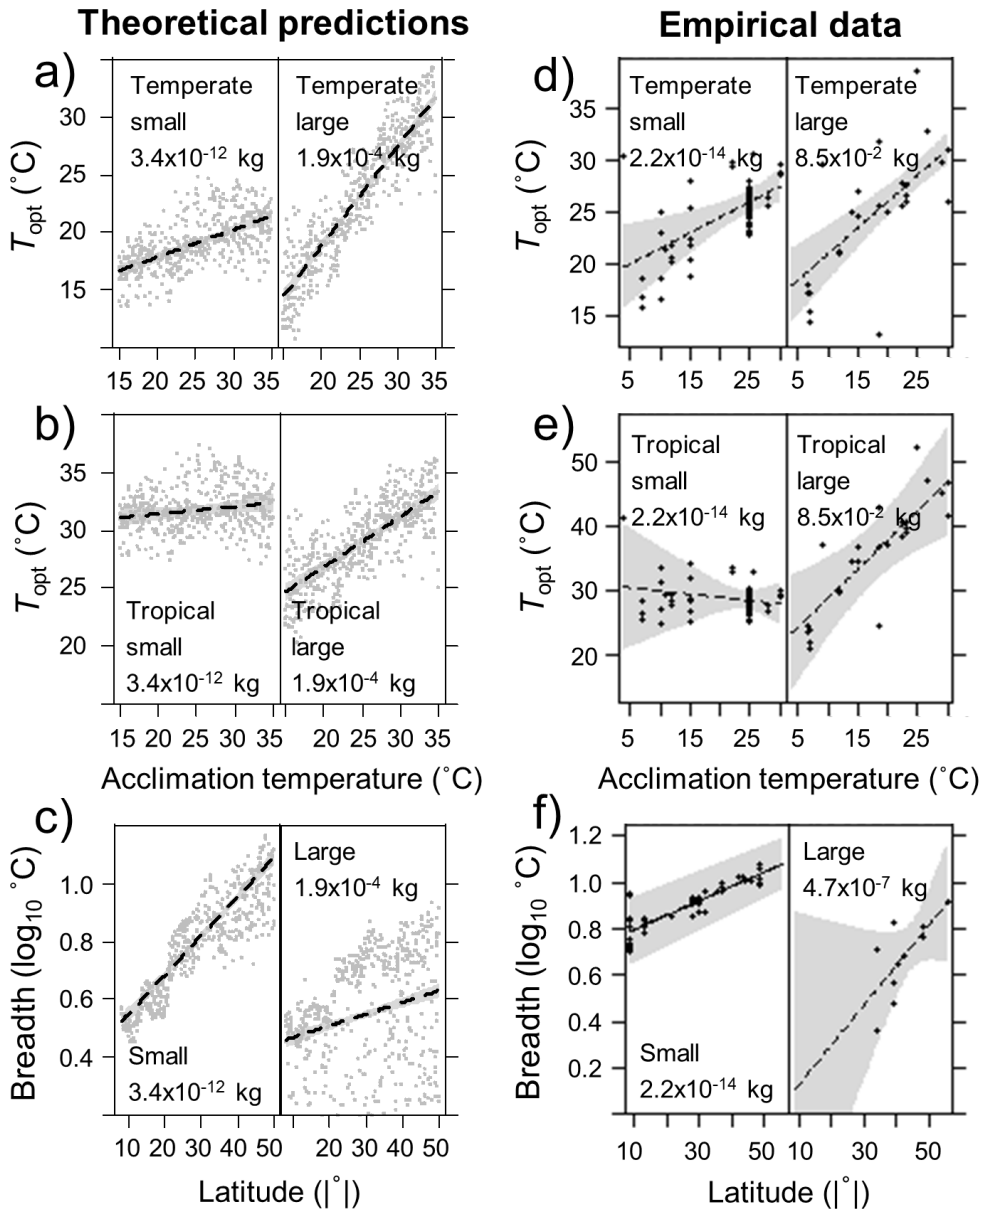

**Figure 3 | Partial residual plots showing the predicted and observed effects of acclimation temperature, body mass, and latitude on optimal performance temperature and thermal breadth for a diversity of taxa and habitats. a), b), and c) show results from our mathematical model for optimal performance temperature ( $T_{opt}$ ) at 45 and 5 degrees latitude and for thermal breadth, respectively (see SI Appendix for parameters). d), e), and f) show the same plots, respectively, but for Johnson-Lewin model fits (see See SI Appendix, Fig. S7 and S8 for similar results using Weibull fits) to empirical data obtained from Dell et al. dataset (three-way interaction for  $T_{opt}$ :  $X^2=8.08$ ,  $P=0.0045$ ,  $n=105$ ; two-way interaction for breadth:  $X^2=13.61$ ,  $P<0.001$ ,  $n=64$ ; log masses  $<10^{-5}$  kg). Subpanels represent different body size categories (breaks based on 20<sup>th</sup> and 80<sup>th</sup> percentiles). Gray shading shows associated 95% confidence bands. See See SI Appendix, Fig. S11 for similar results from the model when no relationship between acclimation rate and temperature is assumed (assumption here is an exponential relationship).**



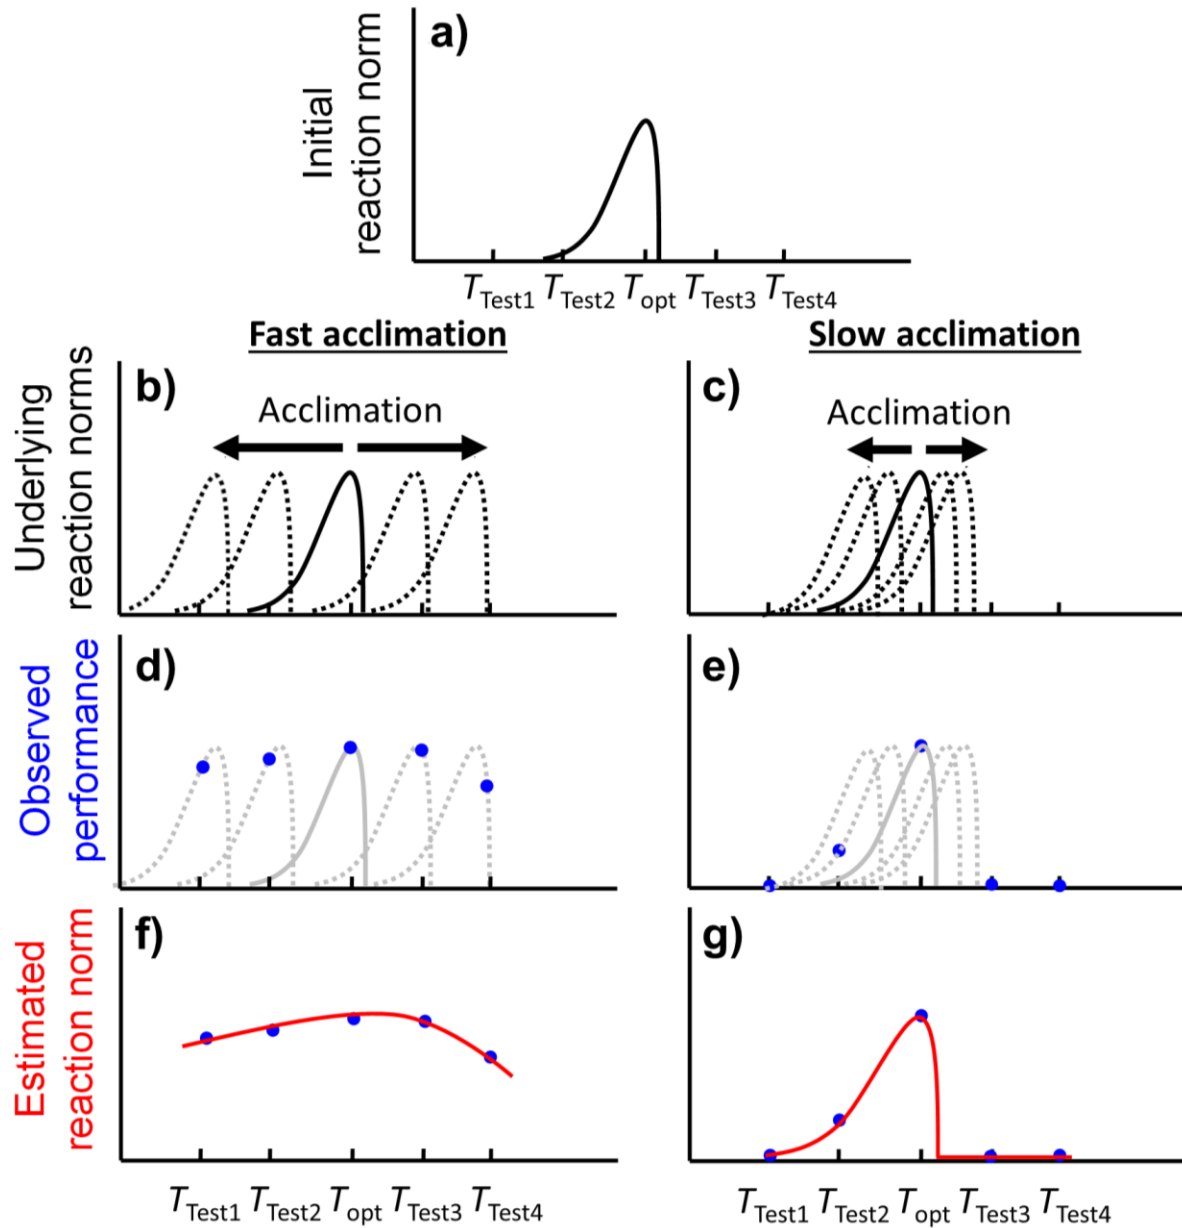

**Figure 4 | Conceptual framework connecting time to acclimate with thermal performance breadth.** If organisms a) have thermal response curves of fixed shapes with an optimal temperature ( $T_{opt}$ ), but can acclimate either b) rapidly or c) slowly to different test temperatures ( $T_{Test1} \dots T_{Test4}$ ) by sliding these reaction norms along the temperature axis during a finite acclimation time (dashed curves, one corresponding to each test temperature), then organisms that acclimate rapidly can d) maintain high observed performance (blue points) over a larger temperature range than e) those that acclimate slowly. When thermal performance curves (red lines) are fit to the resulting data, organisms that acclimate rapidly appear to have larger breadths than organisms that acclimate more slowly because they exhibit greater acclimation in the delay between when they first experience the test temperature and when researchers begin their performance measurements f), g).

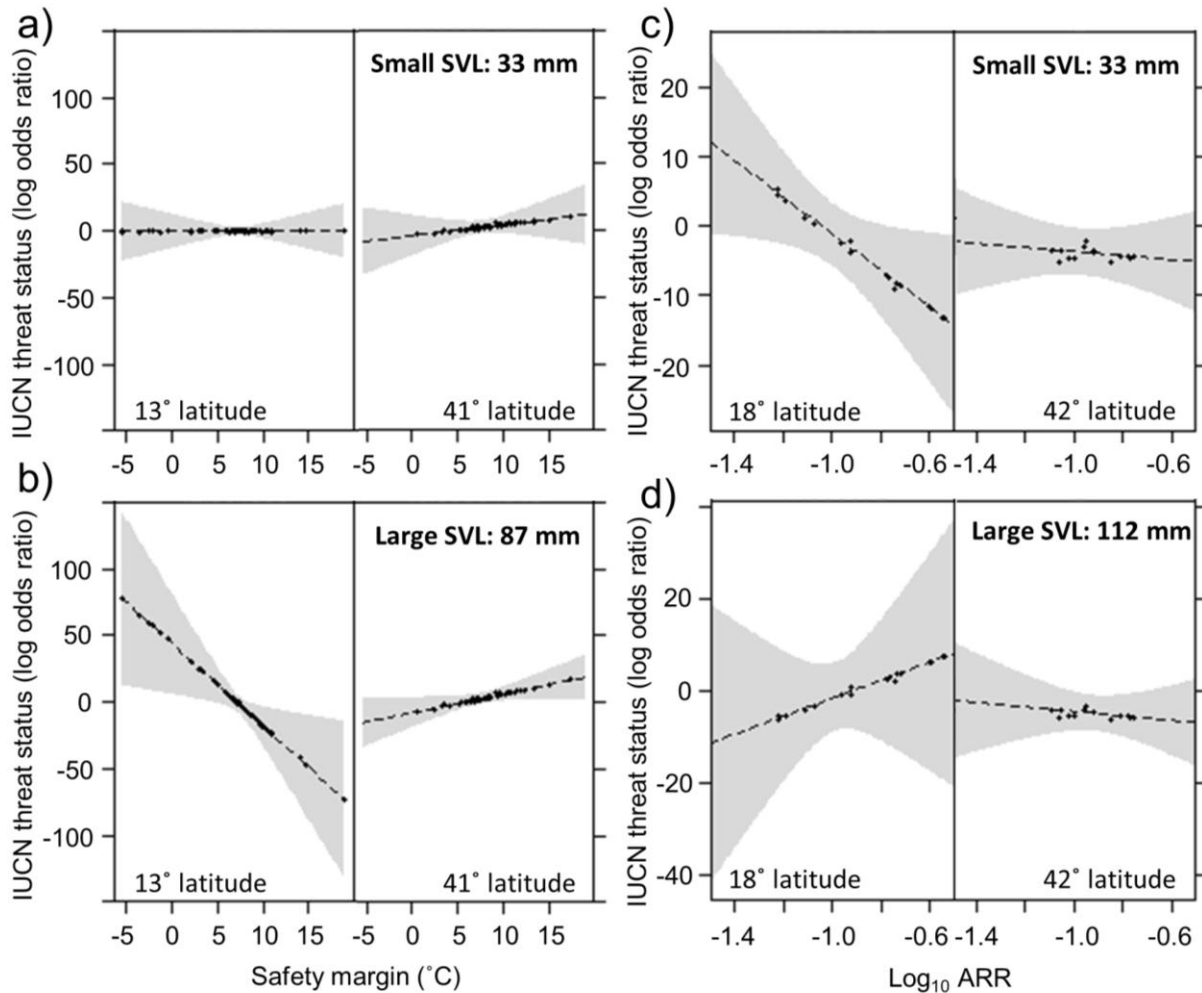

**Figure 5 | Partial residual plots showing that large tropical amphibians are most threatened by climate change at least partially because of limited acclimation abilities.** **a)** and **b)** show the interaction ( $X^2=8.66$ ,  $P=0.0033$ ) among thermal safety margin (critical thermal maximum – maximum temperature of warmest month), the absolute value of latitude, and log body size (**a)** small snout-vent lengths [SVL], **b)** large SVL; 20<sup>th</sup> and 80<sup>th</sup> percentiles) on the odds that amphibian species with small geographic ranges (conditioned to the 20<sup>th</sup> percentile; 3.8 log km<sup>2</sup>) are categorized as threatened or not by the IUCN ( $n=186$ ; see See SI Appendix, Fig. S9 for species with large geographic ranges). **c)** and **d)** show the interaction ( $X^2=8.66$ ,  $P=0.0033$ ) among acclimation response ratio (ARR, a measure of thermal acclimation plasticity), the absolute value of latitude, and log body size (**c)** small SVL, **d)** large SVL) on the odds that amphibian species with a small thermal safety margin (conditioned to the 20<sup>th</sup> percentile; 5.8° C) are threatened ( $P<0.05$ ;  $n=74$ ; see See SI Appendix, Table S9 for full statistical model). Subpanels represent different latitude categories (breaks at 10<sup>th</sup> and 90<sup>th</sup> percentiles), revealing that large tropical amphibians are at the greatest threat from climate change (i.e., when the safety margin is small, **a, b)** perhaps because plasticity reduces this threat less so for large than small amphibians at low latitudes (**c,d)**. Gray shading shows associated 95% confidence bands.
